# Supplementary material for: From leather wastes to leather: enhancement of low quality leather using collagen recovered from leather tanned wastes
Source: Springer Nature journal article supplement (doi:10.1007/s10098-023-02552-w), 2023-06-01
Supplement: MOESM1 [file 25437082]

**From leather wastes to leather: enhancement of low quality leather using collagen recovered from leather tanned wastes**

Marika Gargano\*, Claudia Florio, Giovanni Sanna, Vincenzo Lettera

\* Corresponding author. Department of Chemical Sciences, University of Napoli Federico II, Complesso Universitario di Monte S. Angelo, via Cinthia 21, 80126, Napoli, Italy

E-mail address: [marika.gargano@unina.it](mailto:marika.gargano@unina.it)

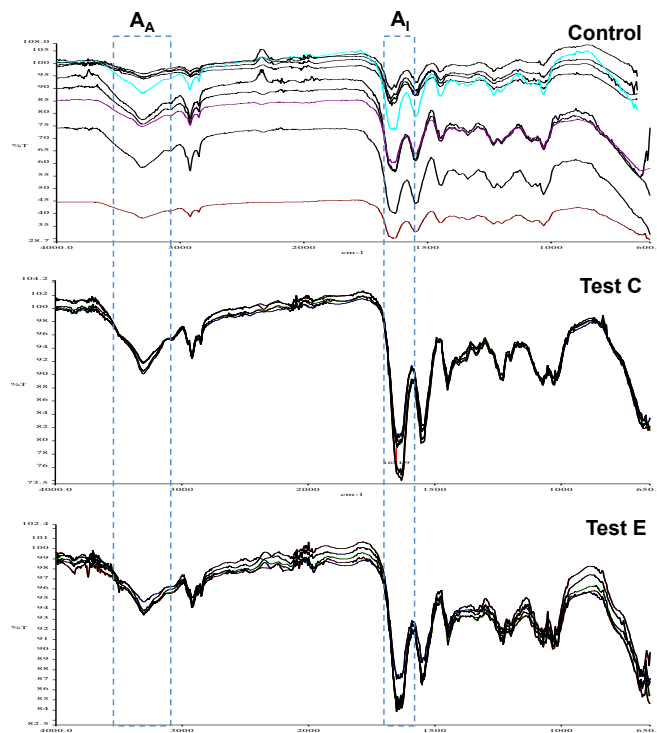

ATR-IR spectra of different areas of control sample, Test C and Test E
