# Supplementary material for: From leather wastes to leather: enhancement of low quality leather using collagen recovered from leather tanned wastes
Source: Springer Nature journal article supplement (doi:10.1007/s10098-023-02552-w), 2023-06-01
Supplement: MOESM2 [file 25437082]

## Clean Technologies and Environmental Policy

### From leather wastes to leather: enhancement of low quality leather using collagen recovered from leather tanned wastes

Marika Gargano\*, Claudia Florio, Giovanni Sannia, Vincenzo Lettera

\* Corresponding author. Department of Chemical Sciences, University of Napoli Federico II, Complesso Universitario di Monte S. Angelo, via Cinthia 21, 80126, Napoli, Italy

E-mail address: [marika.gargano@unina.it](mailto:marika.gargano@unina.it)

Cross-linking degrees of control, Test C and Test E samples, expressed as the ratio between Amide I and Amide A signals ( $A_I/A_A$ )

|                | <b>Control</b>  | <b>Test C</b>   | <b>Test E</b>   |
|----------------|-----------------|-----------------|-----------------|
|                | 0.81            | 0.92            | 0.98            |
|                | 0.78            | 0.90            | 1.00            |
|                | 0.75            | 0.92            | 0.97            |
|                | 0.69            | 0.90            | 0.97            |
|                | 0.65            | 0.89            | 0.99            |
| $A_I/A_A$      | 0.67            | 0.89            | 0.99            |
|                | 0.96            | 0.88            | 0.98            |
|                | 0.91            | 0.88            | 0.98            |
|                | 0.83            | 0.87            | 0.98            |
|                | 0.72            | 0.87            | 0.97            |
| <b>Average</b> | $0.78 \pm 0.10$ | $0.89 \pm 0.02$ | $0.98 \pm 0.01$ |
