# Supplementary material for: From leather wastes to leather: enhancement of low quality leather using collagen recovered from leather tanned wastes
Source: Springer Nature journal article supplement (doi:10.1007/s10098-023-02552-w), 2023-06-01
Supplement: MOESM3 [file 25437082]

## Clean Technologies and Environmental Policy

### From leather wastes to leather: enhancement of low quality leather using collagen recovered from leather tanned wastes

Marika Gargano\*, Claudia Florio, Giovanni Sannia, Vincenzo Lettera

\* Corresponding author. Department of Chemical Sciences, University of Napoli Federico II, Complesso Universitario di Monte S. Angelo, via Cinthia 21, 80126, Napoli, Italy

E-mail address: [marika.gargano@unina.it](mailto:marika.gargano@unina.it)

#### Touch Pleasure Index and Fullness Index

Touch Pleasure Index (TPI) and Fullness Index (FI) were calculated according to the following formula:

$$TPI \text{ or } FI = \frac{d_1 + d_2 + d_3 + \dots + d_n}{D \times n}$$

where d is each assigned degree; D is the maximum possible degree and n is the number of estimators that have performed the test.

Degrees of sensorial experience test

| Degree | Pleasure at the touch | Fullness      |
|--------|-----------------------|---------------|
| 1      | Very unpleasant       | Very empty    |
| 2      | Unpleasant            | Empty         |
| 3      | Slightly pleasant     | Slightly full |
| 4      | Pleasant              | Full          |
| 5      | Very pleasant         | Very full     |
