# Supplementary material for: From leather wastes to leather: enhancement of low quality leather using collagen recovered from leather tanned wastes
Source: Springer Nature journal article supplement (doi:10.1007/s10098-023-02552-w), 2023-06-01
Supplement: MOESM4 [file 25437082]

## Clean Technologies and Environmental Policy

### From leather wastes to leather: enhancement of low quality leather using collagen recovered from leather tanned wastes

Marika Gargano\*, Claudia Florio, Giovanni Sanna, Vincenzo Lettera

\* Corresponding author. Department of Chemical Sciences, University of Napoli Federico II, Complesso Universitario di Monte S. Angelo, via Cinthia 21, 80126, Napoli, Italy

E-mail address: [marika.gargano@unina.it](mailto:marika.gargano@unina.it)

Costs/Benefits analysis of traditional and innovative re-tanning processes

|                                    | Costs related to the re-tanning of 1 piece of ovine leather |          |                                       |          |                                       |          |
|------------------------------------|-------------------------------------------------------------|----------|---------------------------------------|----------|---------------------------------------|----------|
|                                    | Traditional re-tanning<br>(CONTROL)                         |          | Collagen-based re-tanning<br>(TEST C) |          | Collagen-based re-tanning<br>(TEST E) |          |
|                                    | Input                                                       |          | Input                                 |          | Input                                 |          |
|                                    | Amount                                                      | Cost     | Amount                                | Cost     | Amount                                | Cost     |
| Leather <sup>a</sup>               | 0.2 kg                                                      | € 7.50   | 0.2 kg                                | € 7.50   | 0.2 kg                                | € 7.50   |
| Process water <sup>b</sup>         | 0.0007 m <sup>3</sup>                                       | € 0.0006 | 0.0007 m <sup>3</sup>                 | € 0.0006 | 0.0007 m <sup>3</sup>                 | € 0.0006 |
| <b>Fatliquoring step</b>           |                                                             |          |                                       |          |                                       |          |
| - Lipoderm <sup>c</sup>            | 0.006 kg                                                    | € 0.024  | 0.006 kg                              | € 0.024  | 0.006 kg                              | € 0.024  |
| - Coripol <sup>d</sup>             | 0.006 kg                                                    | € 0.015  | 0.006 kg                              | € 0.015  | 0.006 kg                              | € 0.015  |
| - Temperature <sup>e</sup>         | 45°C                                                        | € 0.34   | 45°C                                  | € 0.34   | 45°C                                  | € 0.34   |
| - Stirring <sup>f</sup>            | 100 rpm                                                     | € 0.0135 | 100 rpm                               | € 0.0135 | 100 rpm                               | € 0.0135 |
| - Process time                     | 1 h                                                         | -        | 1 h                                   | -        | 1 h                                   | -        |
| Process water <sup>b</sup>         | 0.0007 m <sup>3</sup>                                       | € 0.0006 | 0.0007 m <sup>3</sup>                 | € 0.0006 | 0.0007 m <sup>3</sup>                 | € 0.0006 |
| <b>Resins-based filling step</b>   |                                                             |          |                                       |          |                                       |          |
| - Sellasol <sup>g</sup>            | 0.012 kg                                                    | € 0.034  | 0.012 kg                              | € 0.034  |                                       |          |
| - Melamina <sup>h</sup>            | 0.012 kg                                                    | € 0.019  | 0.012 kg                              | € 0.019  |                                       |          |
| - Tara <sup>i</sup>                | 0.012 kg                                                    | € 0.028  | 0.012 kg                              | € 0.028  |                                       |          |
| - Basytan <sup>j</sup>             | 0.012 kg                                                    | € 0.022  | 0.012 kg                              | € 0.022  |                                       |          |
| - Temperature <sup>e</sup>         | 45°C                                                        | € 0.51   | 45°C                                  | € 0.51   |                                       |          |
| - Stirring <sup>f</sup>            | 100 rpm                                                     | € 0.02   | 100 rpm                               | € 0.02   |                                       |          |
| - Process time                     | 1.5 h                                                       | -        | 1.5 h                                 | -        |                                       |          |
| <b>Collagen-based filling step</b> |                                                             |          |                                       |          |                                       |          |
| - Collagen <sup>k</sup>            |                                                             |          | 0.010 kg                              | € 0.789  | 0.010 kg                              | € 0.789  |
| - Enzyme <sup>l</sup>              |                                                             |          | 0.010 kg                              | € 1.00   | 0.010 kg                              | € 1.00   |
| - Casein <sup>m</sup>              |                                                             |          | 0.001 kg                              | € 0.12   | 0.001 kg                              | € 0.12   |
| - Temperature <sup>e</sup>         |                                                             |          | 45°C                                  | € 1.54   | 45°C                                  | € 1.54   |
| - Stirring <sup>f</sup>            |                                                             |          | 150 rpm                               | € 0.06   | 150 rpm                               | € 0.06   |
| - Process time                     |                                                             |          | 4.5 h                                 | -        | 4.5 h                                 | -        |
| <b>Total costs</b>                 |                                                             | € 8.52   |                                       | € 12.03  |                                       | € 11.40  |
| Leather added value <sup>n</sup>   |                                                             | € 12.50  |                                       | € 17.50  |                                       | € 17.50  |
| <b>Gain</b>                        |                                                             | € 3.98   |                                       | € 5.47   |                                       | € 6.10   |

a) Low quality leather costs 15.00 €·m<sup>-2</sup>, 1 piece of ovine leather is 0.5 m<sup>2</sup> and 0.4 kg·m<sup>-2</sup>

b) Water costs: 0.88 €·m<sup>-3</sup> (Resolution ARERA n.665/2017/R/Idr)

c) Lipoderm costs: 4.030 €·kg<sup>-1</sup>

d) Coripol costs: 2.551 €·kg<sup>-1</sup>

e) Estimated as 1.27 kW per 0.27 €·kW<sup>-1</sup>·h<sup>-1</sup> per process time

Where 1.27 kW is the power required by the used oven (Heraus Function Line UT 6); 0.27 €·kW<sup>-1</sup>·h<sup>-1</sup> is the current cost of the electricity (Resolution ARERA n.621/2021/R/eel)

f) Estimated as 0.05 kW per 0.27 €·kW<sup>-1</sup>·h<sup>-1</sup> per process time

Where 0.05 kW is the power required by the orbital shaker (Stuart Scientific SSL1); 0.27 €·kW<sup>-1</sup>·h<sup>-1</sup> is the cost of electricity (Resolution ARERA n.621/2021/R/eel)

g) Sellasol costs: 2.863 €·kg<sup>-1</sup>

- h) Melamina costs:  $1.660 \text{ €}\cdot\text{kg}^{-1}$
- i) Tara costs:  $2.35 \text{ €}\cdot\text{kg}^{-1}$
- j) Basytan costs:  $1.85 \text{ €}\cdot\text{kg}^{-1}$
- k) Collagen costs:  $78.90 \text{ €}\cdot\text{kg}^{-1}$ . The extraction costs were estimated in “Leather industry towards circular economy: enzymatic extraction of potential high added-value products from tanned wastes”
- l) Transglutaminase costs:  $100.00 \text{ €}\cdot\text{kg}^{-1}$  (the cheapest price present on the market related to the product with analogue characteristics)
- m) Casein costs:  $120.00 \text{ €}\cdot\text{kg}^{-1}$  (the cheapest price present on the market related to the product with analogue characteristics)
- n) In the same category, filled leather costs  $25.00 \text{ €}\cdot\text{m}^{-2}$  and well filled leather  $35.00 \text{ €}\cdot\text{m}^{-2}$
